# Supplementary material for: Tough and injectable fiber reinforced calcium phosphate cement as an alternative to polymethylmethacrylate cement for vertebral augmentation: a biomechanical study
Source: Royal Society of Chemistry journal article supplement (doi:10.1039/d0bm00413h), 2020-01-01
Supplement: d0bm00413h1.pdf [file d0bm00413h1.pdf]

**Tough and injectable fiber reinforced calcium phosphate cement as an alternative to polymethylmethacrylate cement for vertebral augmentation: a biomechanical study**

Sónia de Lacerda Schickert, João Castro Pinto, John Jansen, Sander C. G. Leeuwenburgh, Jeroen J.J.P. van den Beucken

**Supplemental Information**

**Table S1** - Semi-quantitative scoring system used to evaluate the cohesion of the CPC formulations

| GRADE | PARTICULATE CLOUD FORMATION                                                           |
|-------|---------------------------------------------------------------------------------------|
| 1     | Virtually no particulate cloud formation                                              |
| 2     | Minimal particulate cloud formation upon injection into aqueous environment           |
| 3     | Visible particulate cloud formation in the vicinity of the injected CPC               |
| 4     | Large particulate cloud formation that spreads over the majority of the liquid volume |
| 5     | Virtually no cohesion present, with near total disintegration of CPC                  |

  

| GRADE | FRAGMENTATION                                                                             |
|-------|-------------------------------------------------------------------------------------------|
| 1     | A continuous tube of CPC is extruded                                                      |
| 2     | CPC tube remains almost continuous with an average tube length > 5 cm                     |
| 3     | CPC tube fractures in several points with an average tube length of 3 cm                  |
| 4     | Prevalence of fracture points in CPC tube is frequent with the average tube length < 1 cm |
| 5     | Virtually no cohesive properties present, with total disintegration of CPC                |

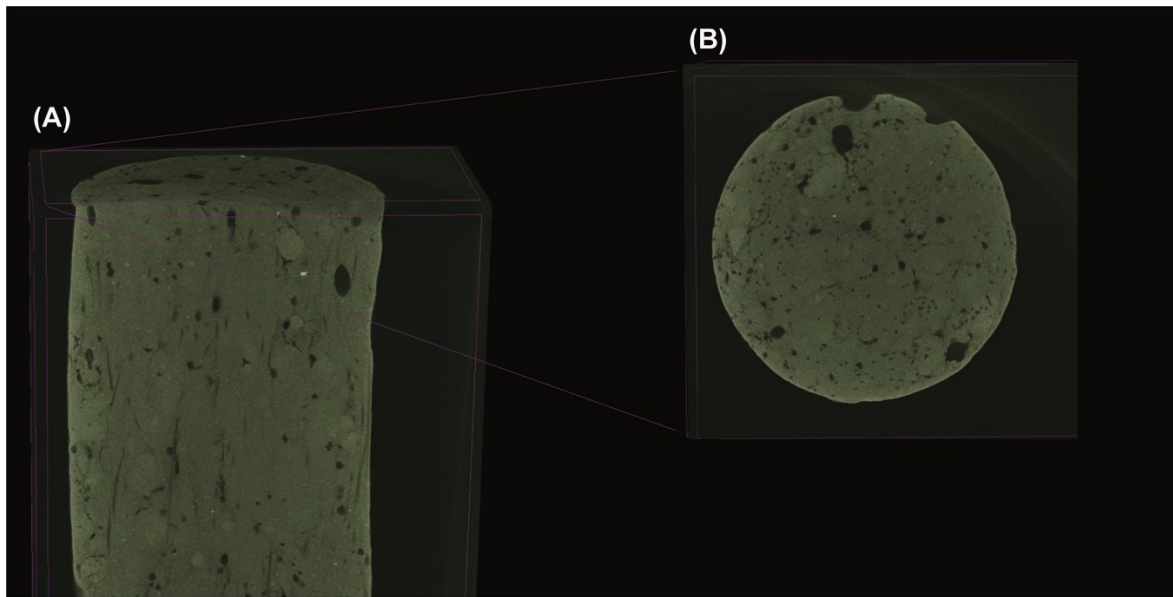

**Figure S1.** Micro-CT images of extruded cement paste in a (A) a lateral view and (B) a top view.
